# Supplementary material
Source: publisher site journal article supplement (https://www.spandidos-publications.com/1813/downloadSupplementary)
Supplement: Supplementary file 1 [file downloadSupplementary]

Table SI. The body weight of rats in each group on day 45.

|                 | Controls    | PCPA group               | D-gal group              | PCPA+D group             |
|-----------------|-------------|--------------------------|--------------------------|--------------------------|
| Body weight (g) | 406.2±21.76 | 358.2±16.59 <sup>a</sup> | 350.1±14.25 <sup>a</sup> | 313.1±13.79 <sup>b</sup> |

Data are expressed as mean ± standard deviation. <sup>a</sup>P<0.01 vs. model group. <sup>b</sup>P<0.01 vs. controls. PCPA, para-chlorophenylalanine; D-gal, D-galactose.
